# Supplementary material
Source: MDPI journal article supplement (https://www.mdpi.com/2297-8739/10/8/444)
Supplement: s1 [file s1]

## *p*-synephrine

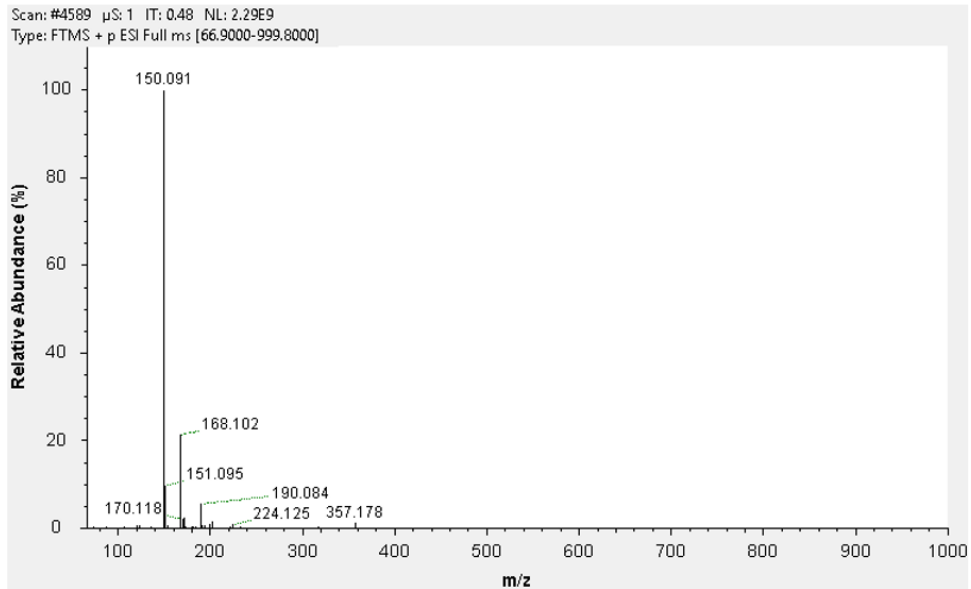

## *m*-synephrine

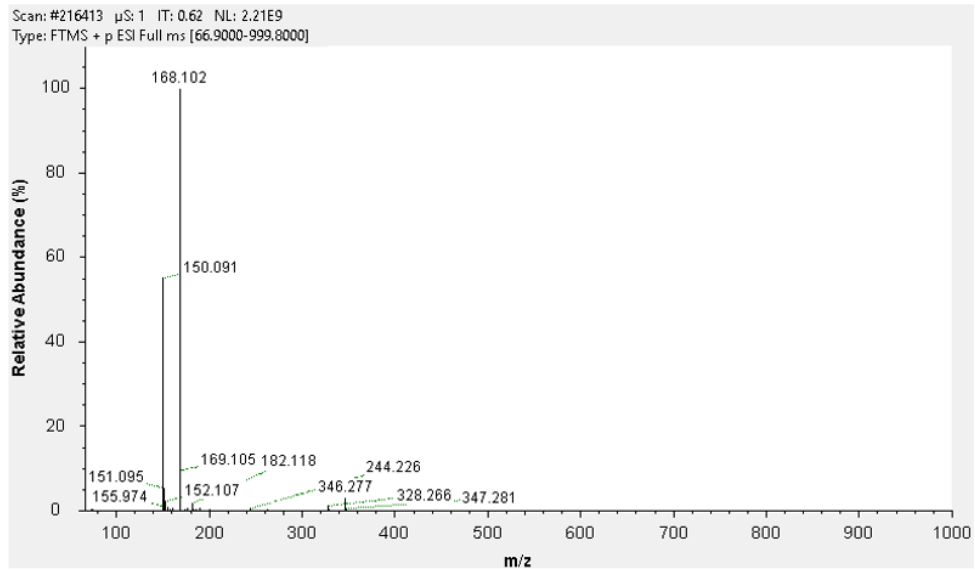

## SIL *p*-synephrine

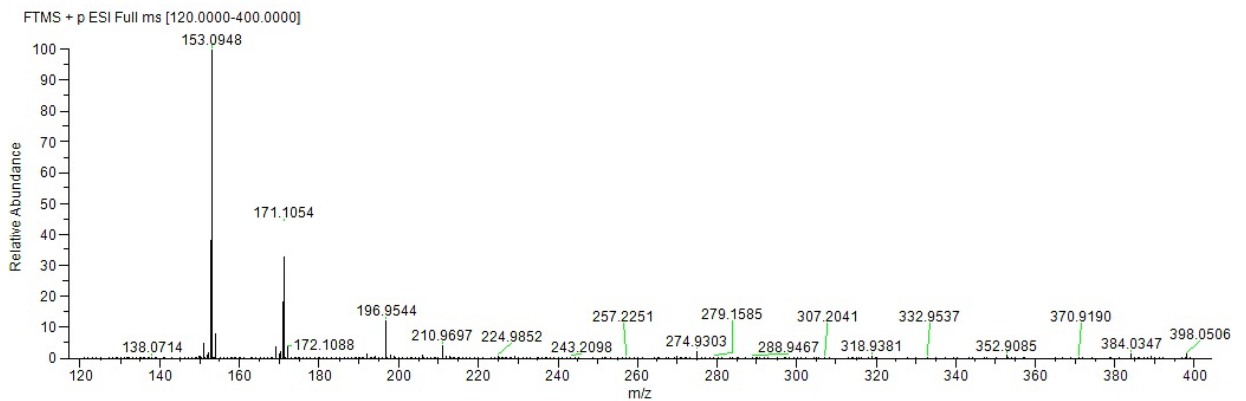

**Supplemental data:** The MS spectra obtained for *p*-synephrine and *m*-synephrine upon infusion under the current MS settings. The full scan MS spectra (m/z range 120-400) obtained for the SIL with the current MS settings,

**A**

SDL p-syneprine = 5 ng/mL in matrix

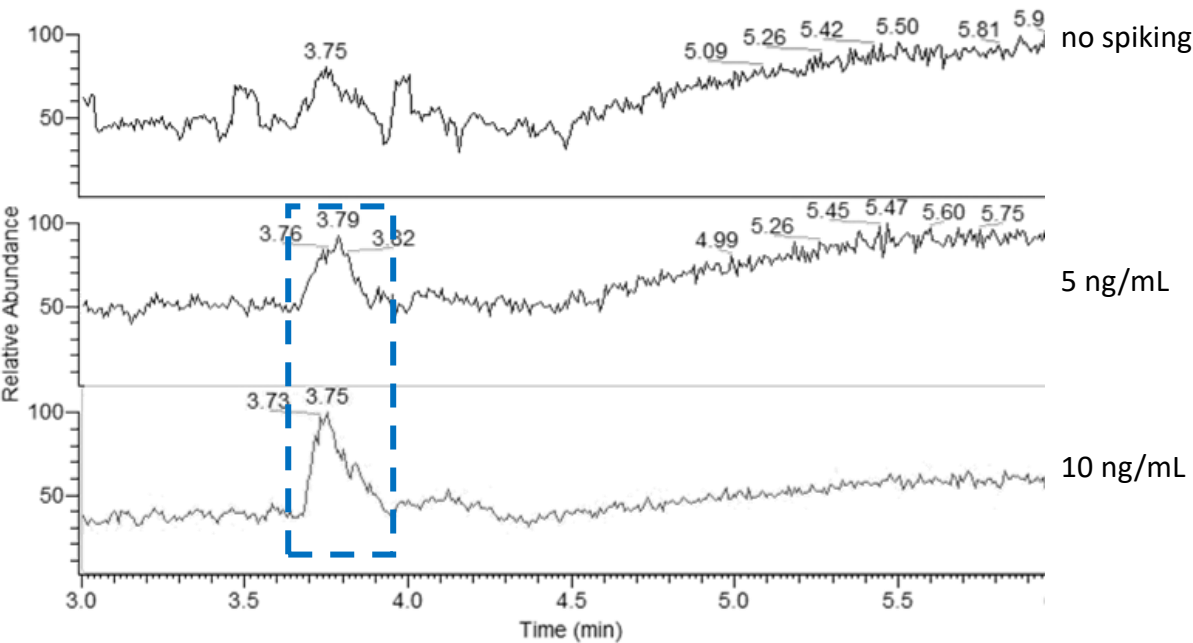**B**

5ngC #308 RT: 3.79 AV: 1 SB: 134 3.00-3.53 , 3.98-4.49 NL: 2.29E4  
F: FTMS + p ESI Full ms2 150.0910@hcd30.00 [50.0000-170.0000]

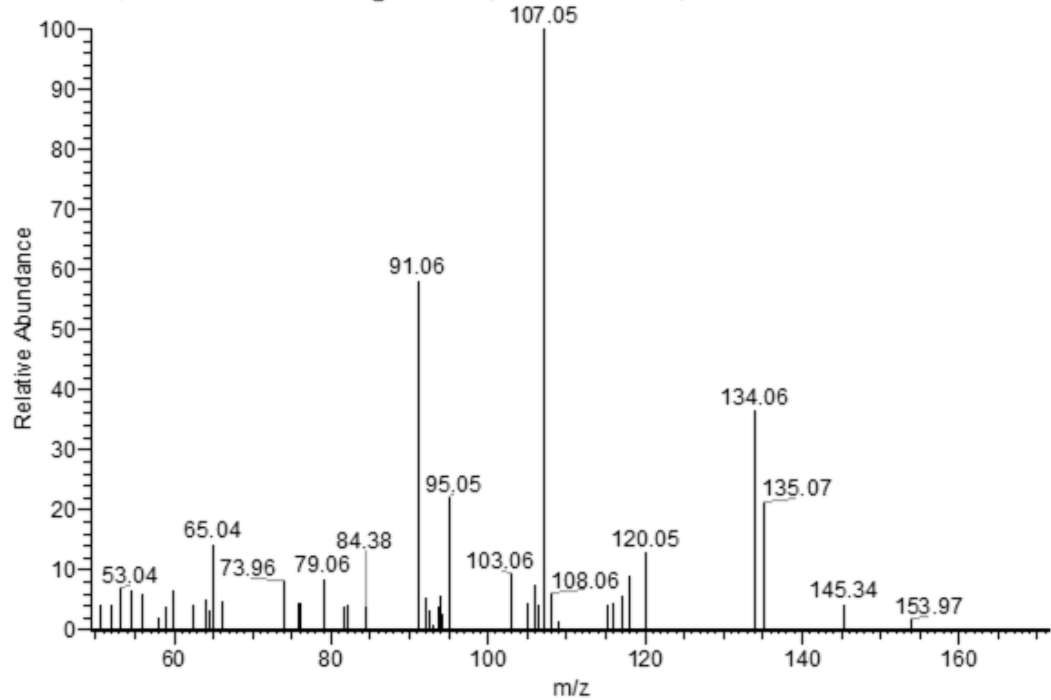

**Supplemental data:** The targeted LC-MS/MS chromatograms obtained in matrix 1 for different concentrations of *p*-syneprine to determine the LOD (A) and the obtained MS/MS spectrum (B).

A

SDL m-syneprine = 10 ng/mL in matrix

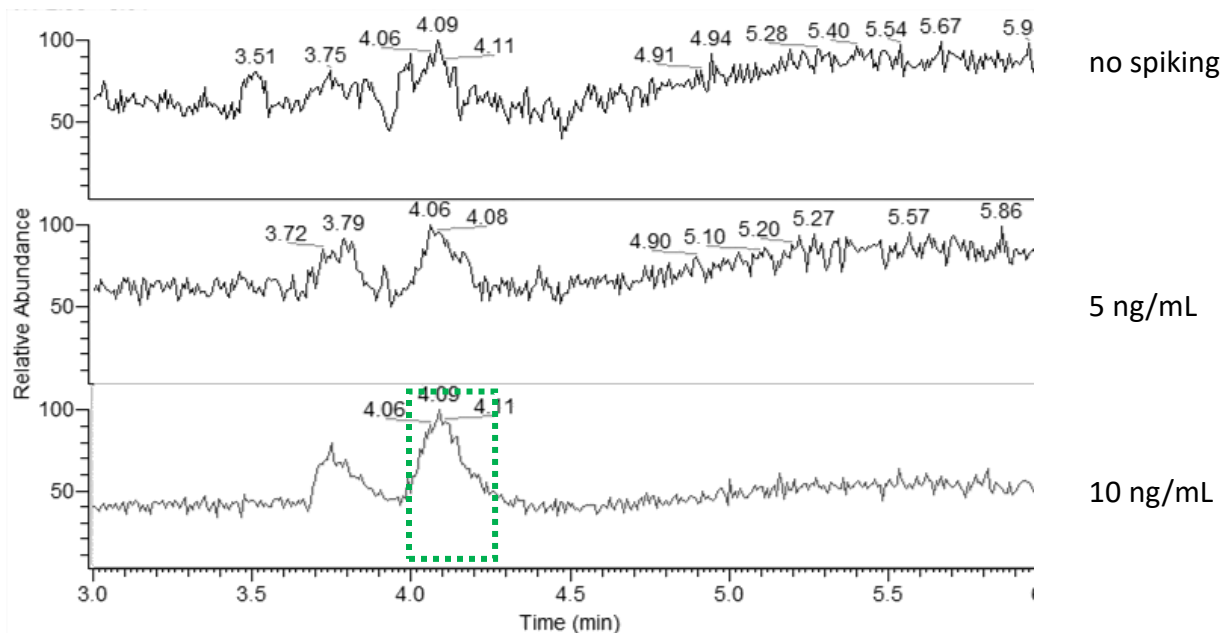

B

10ngC#430 RT: 4.10 AV: 1 SB: 162 4.40-4.97, 3.26-3.93 NL: 1.96E4  
F: FTMS + p ESI Full ms2 168.1020@hcd30.00 [50.0000-190.0000]

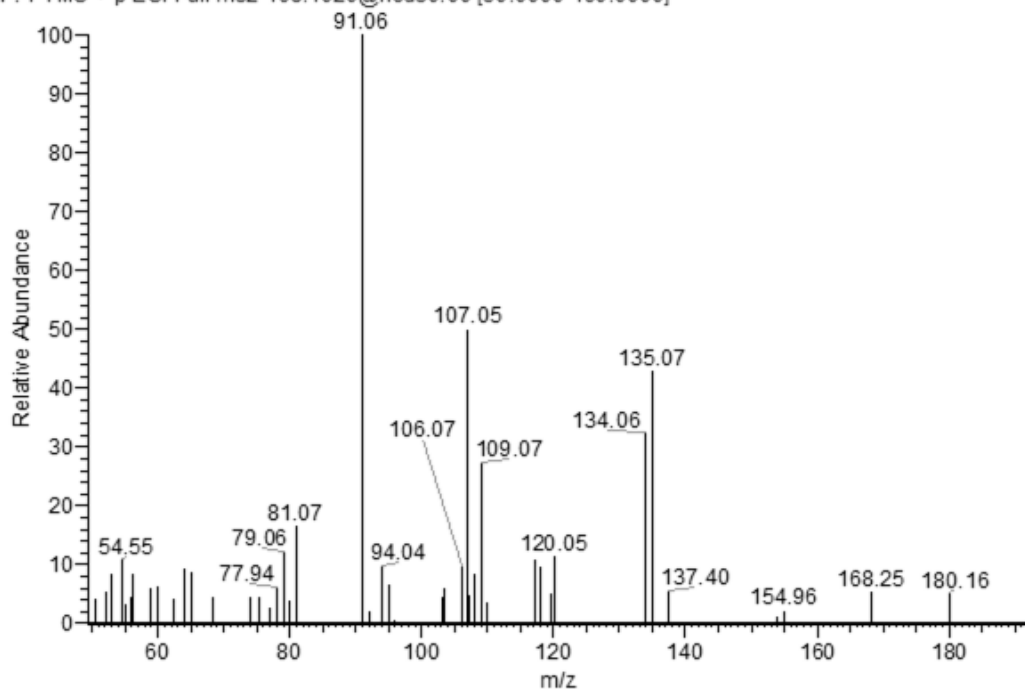

**Supplemental data:** The targeted LC-MS/MS chromatograms obtained in matrix 1 for different concentrations of *m*-syneprine to determine the LOD (A) and the obtained MS/MS spectrum (B).

**A**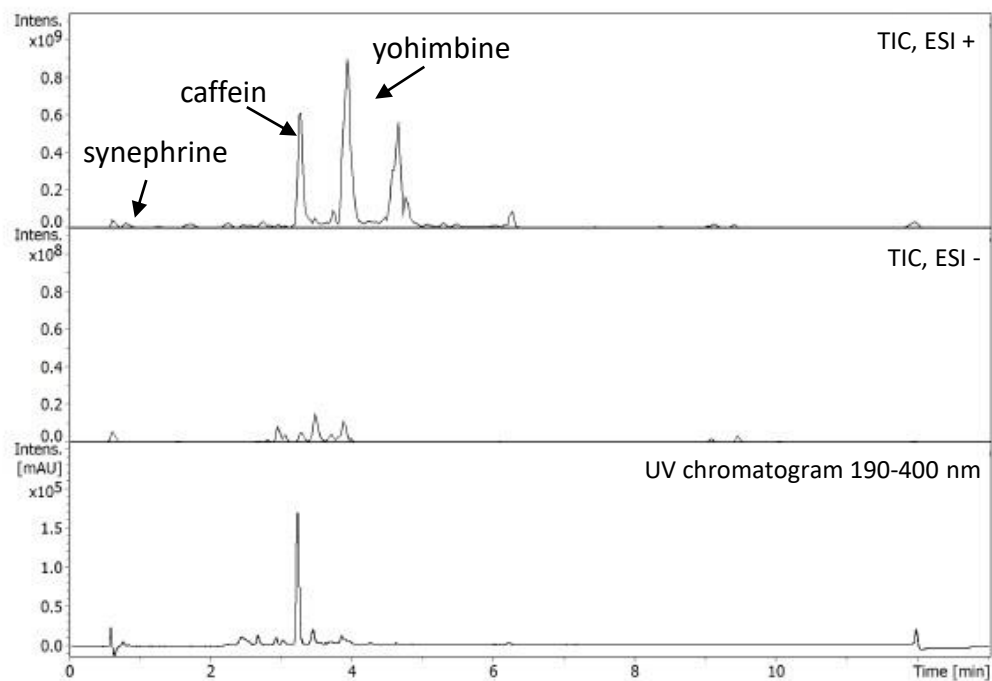**B**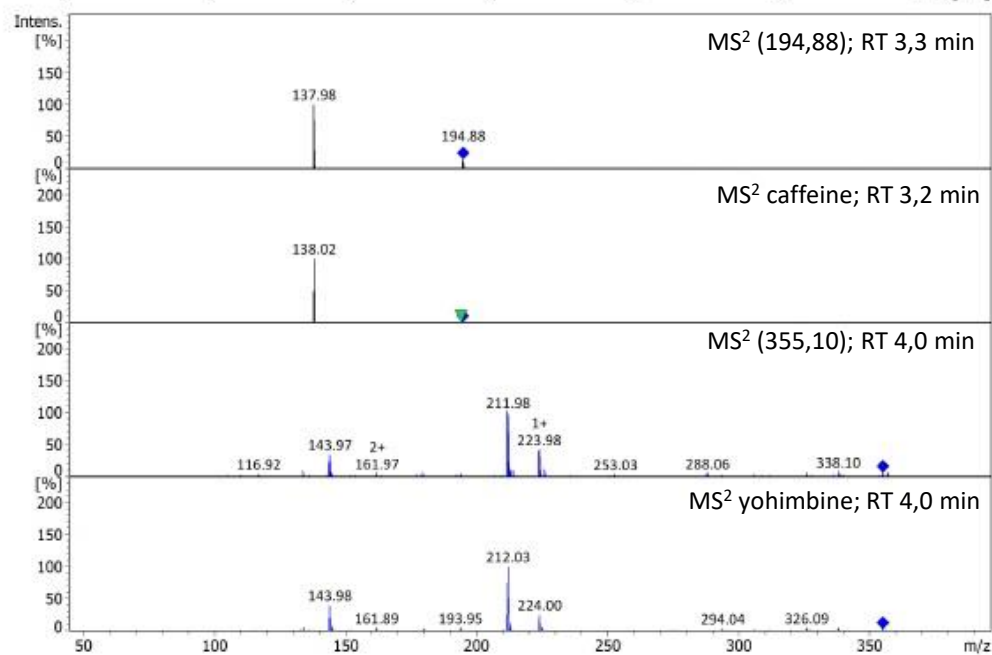

**Supplemental data:** Overview of the total ion chromatograms (TIC) obtained with positive or negative ionization mode and the obtained LC-UV data (A) of sample 2. The obtained  $MS^2$  data from the samples with observed retention time (RT) and the  $MS^2$  data obtained for the reference standard of caffeine or yohimbine (B).

A

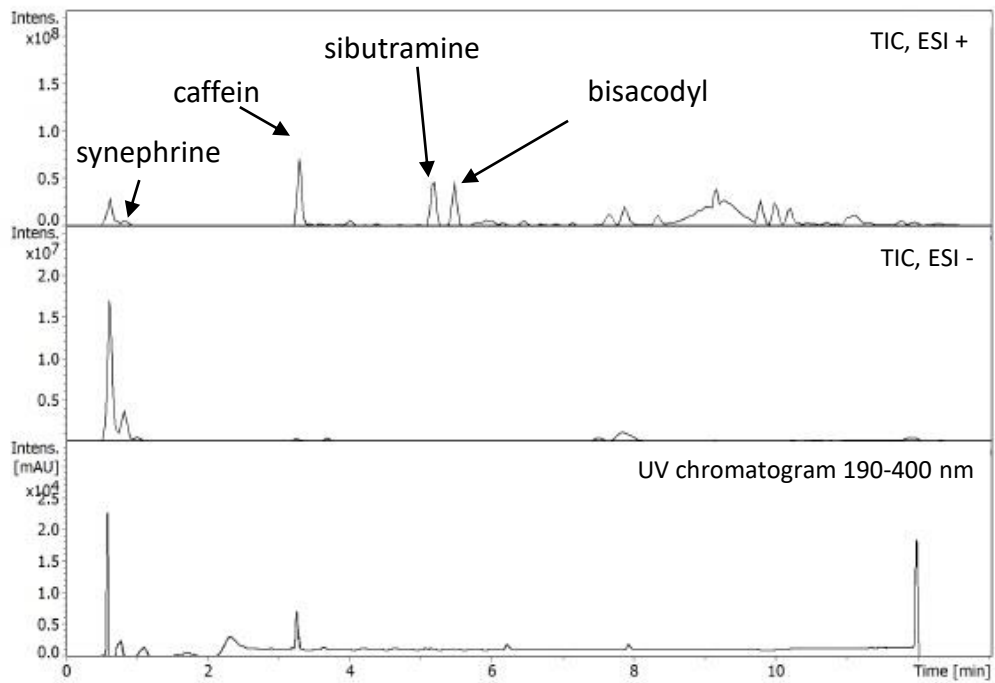

B

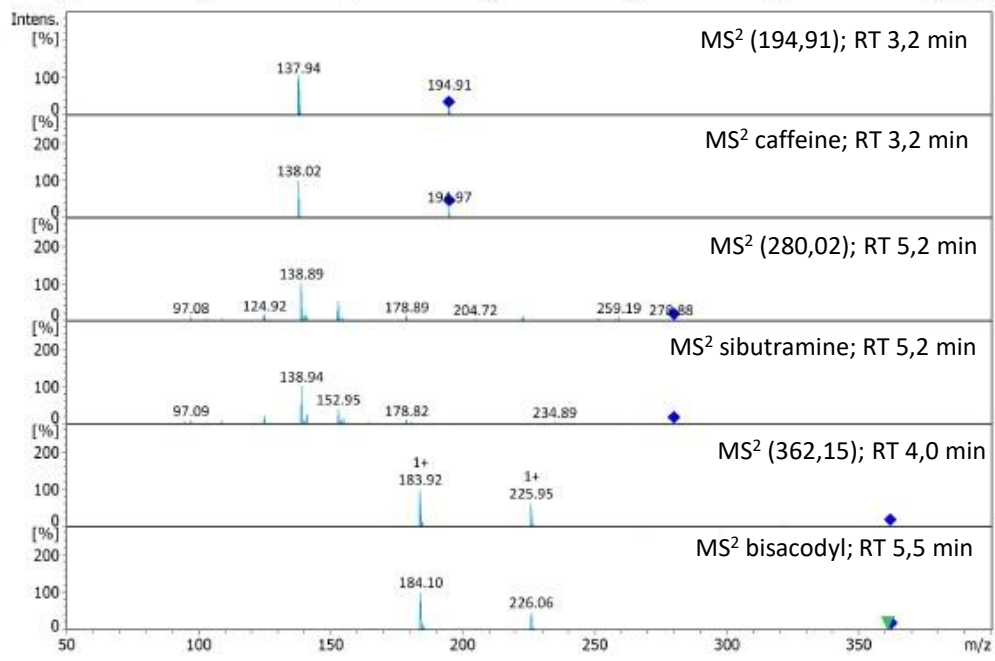

**Supplemental data:** Overview of the total ion chromatograms (TIC) obtained with positive or negative ionization mode and the obtained LC-UV data (A) of sample 7. The obtained MS<sup>2</sup> data from the samples with observed retention time (RT) and the MS<sup>2</sup> data obtained for the reference standard of caffeine or yohimbine (B).

**A**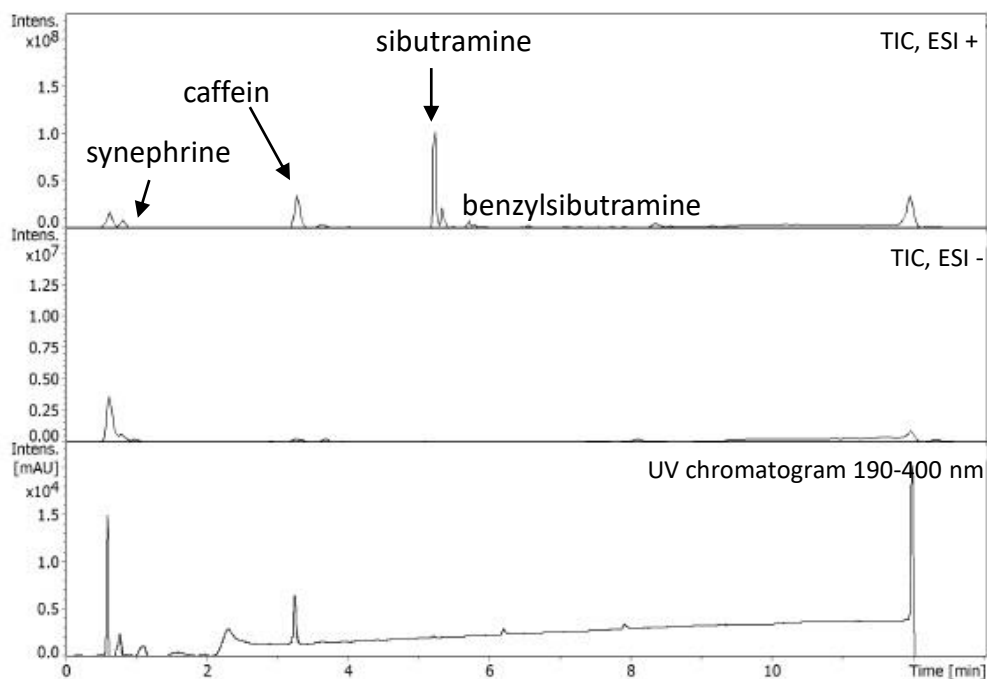**B**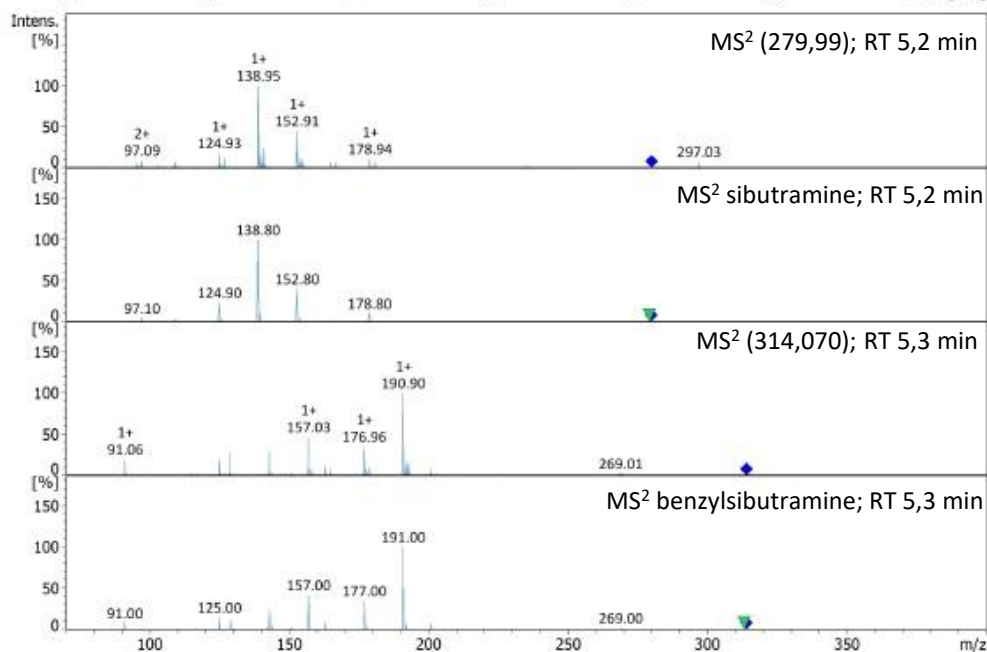

**Supplemental data:** Overview of the total ion chromatograms (TIC) obtained with positive or negative ionization mode and the obtained LC-UV data (A) of sample 8. The obtained  $MS^2$  data from the samples with observed retention time (RT) and the  $MS^2$  data obtained for the reference standard of caffeine or yohimbine (B).
