# Supplementary material
Source: MDPI journal article supplement (https://www.mdpi.com/2297-8739/10/8/444)
Supplement: s1 [file s1]

Archive with 1 entries (1 files):
- separations-2542702-supplementary.pdf
